# Supplementary material
Source: MDPI journal article supplement (https://www.mdpi.com/2624-8549/2/1/4)

# checkCIF/PLATON report

Structure factors have been supplied for datablock(s) c01a\_1a\_sq

THIS REPORT IS FOR GUIDANCE ONLY. IF USED AS PART OF A REVIEW PROCEDURE FOR PUBLICATION, IT SHOULD NOT REPLACE THE EXPERTISE OF AN EXPERIENCED CRYSTALLOGRAPHIC REFEREE.

No syntax errors found.      CIF dictionary      Interpreting this report

## Datablock: c01a\_1a\_sq

---

|                 |                                                               |                                                                 |
|-----------------|---------------------------------------------------------------|-----------------------------------------------------------------|
| Bond precision: | C-C = 0.0039 A                                                | Wavelength=0.68890                                              |
| Cell:           | a=32.77108(17)                                                | b=30.00687(16)      c=40.3365(2)                                |
|                 | alpha=90                                                      | beta=96.1279(5)      gamma=90                                   |
| Temperature:    | 100 K                                                         |                                                                 |
|                 | Calculated                                                    | Reported                                                        |
| Volume          | 39438.6(4)                                                    | 39438.6(3)                                                      |
| Space group     | C 2/c                                                         | C 1 2/c 1                                                       |
| Hall group      | -C 2yc                                                        | -C 2yc                                                          |
| Moiety formula  | C336 H262 Co8 N72, 2.84(C9 H6 O2), B2 F5, 7(B F4) [+ solvent] | C336 H262 Co8 N72, 3.5(B2 F8), B2 F5, 1.434(C18 H12 O4), 7[BF4] |
| Sum formula     | C361.56 H279.04 B9 Co8 F33 N72 O5.68 [+ solvent]              | C398.15 H435.65 B16 Co8 F64 N74.85 O39.35                       |
| Mr              | 6918.96                                                       | 8759.54                                                         |
| Dx, g cm-3      | 1.165                                                         | 1.475                                                           |
| Z               | 4                                                             | 4                                                               |
| Mu (mm-1)       | 0.369                                                         | 0.405                                                           |
| F000            | 14223.4                                                       | 18141.0                                                         |
| F000'           | 14239.45                                                      |                                                                 |
| h,k,lmax        | 47,43,58                                                      | 47,43,58                                                        |
| Nref            | 62896                                                         | 62798                                                           |
| Tmin,Tmax       |                                                               | 0.959,1.000                                                     |
| Tmin'           |                                                               |                                                                 |

Correction method= # Reported T Limits: Tmin=0.959 Tmax=1.000  
AbsCorr = EMPIRICAL

Data completeness= 0.998      Theta(max)= 29.947

R(reflections)= 0.0651( 29550)      wR2(reflections)= 0.2292( 62798)

S = 0.957      Npar= 2330

---

The following ALERTS were generated. Each ALERT has the format

**test-name\_ALERT\_alert-type\_alert-level.**

Click on the hyperlinks for more details of the test.

---

### ● Alert level C

|                   |                                                  |        |              |
|-------------------|--------------------------------------------------|--------|--------------|
| PLAT026_ALERT_3_C | Ratio Observed / Unique Reflections (too) Low .. | 47%    | Check        |
| PLAT077_ALERT_4_C | Unitcell Contains Non-integer Number of Atoms .. |        | Please Check |
| PLAT241_ALERT_2_C | High 'MainMol' Ueq as Compared to Neighbors of   |        | C44B Check   |
| PLAT260_ALERT_2_C | Large Average Ueq of Residue Including O14H      | 0.113  | Check        |
| PLAT260_ALERT_2_C | Large Average Ueq of Residue Including F92       | 0.157  | Check        |
| PLAT260_ALERT_2_C | Large Average Ueq of Residue Including F22       | 0.106  | Check        |
| PLAT260_ALERT_2_C | Large Average Ueq of Residue Including F32       | 0.110  | Check        |
| PLAT260_ALERT_2_C | Large Average Ueq of Residue Including F42       | 0.198  | Check        |
| PLAT260_ALERT_2_C | Large Average Ueq of Residue Including F32A      | 0.135  | Check        |
| PLAT905_ALERT_3_C | Negative K value in the Analysis of Variance ... | -6.951 | Report       |
| PLAT911_ALERT_3_C | Missing FCF Refl Between Thmin & STh/L= 0.600    | 47     | Report       |
| PLAT918_ALERT_3_C | Reflection(s) with I(obs) much Smaller I(calc) . | 7      | Check        |
| PLAT978_ALERT_2_C | Number C-C Bonds with Positive Residual Density. | 0      | Info         |

---

### ● Alert level G

FORMU01\_ALERT\_1\_G There is a discrepancy between the atom counts in the  
\_chemical\_formula\_sum and \_chemical\_formula\_moiety. This is  
usually due to the moiety formula being in the wrong format.  
Atom count from \_chemical\_formula\_sum: C398.1499 H435.6499 B16 Co8 F  
Atom count from \_chemical\_formula\_moiety:C361.8120 H279.2079 B16 Co8 F

FORMU01\_ALERT\_1\_G There is a discrepancy between the atom counts in the  
\_chemical\_formula\_sum and the formula from the \_atom\_type\* data.  
Atom count from \_chemical\_formula\_sum:C398.1499 H435.6499 B16 Co8 F64  
Atom count from the \_atom\_type data:

FORMU01\_ALERT\_2\_G There is a discrepancy between the atom counts in the  
\_chemical\_formula\_sum and the formula from the \_atom\_site\* data.  
Atom count from \_chemical\_formula\_sum:C398.1499 H435.6499 B16 Co8 F64  
Atom count from the \_atom\_site data: C361.5599 H279.0399 B9 Co8 F33 N

ABSMU01\_ALERT\_1\_G Calculation of \_exptl\_absorpt\_correction\_mu  
not performed for this radiation type.

CELLZ01\_ALERT\_1\_G Difference between formula and atom\_site contents detected.

CELLZ01\_ALERT\_1\_G ALERT: Large difference may be due to a  
symmetry error - see SYMMG tests  
From the CIF: \_cell\_formula\_units\_Z 4  
From the CIF: \_chemical\_formula\_sum C398.15 H435.65 B16 Co8 F64 N74.85  
TEST: Compare cell contents of formula and atom\_site data

| atom | Z*formula | cif sites | diff   |
|------|-----------|-----------|--------|
| C    | 1592.60   | 1446.24   | 146.36 |
| H    | 1742.60   | 1116.16   | 626.44 |
| B    | 64.00     | 36.00     | 28.00  |
| Co   | 32.00     | 32.00     | 0.00   |
| F    | 256.00    | 132.00    | 124.00 |
| N    | 299.40    | 288.00    | 11.40  |
| O    | 157.40    | 22.72     | 134.68 |

PLAT002\_ALERT\_2\_G Number of Distance or Angle Restraints on AtSite 238 Note

PLAT003\_ALERT\_2\_G Number of Uiso or Uij Restrained non-H Atoms ... 255 Report

PLAT014\_ALERT\_1\_G N.O.K. \_shelx\_fab\_checksum Found in CIF ..... Please Check

PLAT041\_ALERT\_1\_G Calc. and Reported SumFormula Strings Differ Please Check

PLAT042\_ALERT\_1\_G Calc. and Reported MoietyFormula Strings Differ Please Check

PLAT072\_ALERT\_2\_G SHELXL First Parameter in WGHT Unusually Large 0.14 Report

PLAT092\_ALERT\_4\_G Check: Wavelength Given is not Cu,Ga,Mo,Ag,In Ka 0.68890 Ang.

PLAT142\_ALERT\_4\_G s.u. on b - Axis Small or Missing ..... 0.00016 Ang.

|                   |                                                    |             |        |
|-------------------|----------------------------------------------------|-------------|--------|
| PLAT143_ALERT_4_G | s.u. on c - Axis Small or Missing .....            | 0.00020     | Ang.   |
| PLAT175_ALERT_4_G | The CIF-Embedded .res File Contains SAME Records   | 32          | Report |
| PLAT178_ALERT_4_G | The CIF-Embedded .res File Contains SIMU Records   | 1           | Report |
| PLAT187_ALERT_4_G | The CIF-Embedded .res File Contains RIGU Records   | 1           | Report |
| PLAT244_ALERT_4_G | Low 'Solvent' Ueq as Compared to Neighbors of      | B91         | Check  |
| PLAT244_ALERT_4_G | Low 'Solvent' Ueq as Compared to Neighbors of      | B11         | Check  |
| PLAT244_ALERT_4_G | Low 'Solvent' Ueq as Compared to Neighbors of      | B21         | Check  |
| PLAT300_ALERT_4_G | Atom Site Occupancy of F42                         | 0.5         | Check  |
| PLAT300_ALERT_4_G | Atom Site Occupancy of F43                         | 0.5         | Check  |
| PLAT300_ALERT_4_G | Atom Site Occupancy of F44                         | 0.5         | Check  |
| PLAT300_ALERT_4_G | Atom Site Occupancy of F45                         | 0.5         | Check  |
| PLAT300_ALERT_4_G | Atom Site Occupancy of B41                         | 0.5         | Check  |
| PLAT302_ALERT_4_G | Anion/Solvent/Minor-Residue Disorder (Resd 3 )     | 100%        | Note   |
| PLAT302_ALERT_4_G | Anion/Solvent/Minor-Residue Disorder (Resd 7 )     | 100%        | Note   |
| PLAT302_ALERT_4_G | Anion/Solvent/Minor-Residue Disorder (Resd 8 )     | 100%        | Note   |
| PLAT302_ALERT_4_G | Anion/Solvent/Minor-Residue Disorder (Resd 9 )     | 100%        | Note   |
| PLAT304_ALERT_4_G | Non-Integer Number of Atoms in ..... Resd 3        | 7.14        | Check  |
| PLAT304_ALERT_4_G | Non-Integer Number of Atoms in ..... Resd 7        | 3.13        | Check  |
| PLAT304_ALERT_4_G | Non-Integer Number of Atoms in ..... Resd 8        | 2.50        | Check  |
| PLAT304_ALERT_4_G | Non-Integer Number of Atoms in ..... Resd 9        | 1.88        | Check  |
| PLAT343_ALERT_2_G | Unusual sp? Angle Range in Main Residue for        | C24F        | Check  |
| PLAT432_ALERT_2_G | Short Inter X...Y Contact F34A ..C43E              | 2.97        | Ang.   |
|                   | x,y,z =                                            | 1_555       | Check  |
| PLAT606_ALERT_4_G | VERY LARGE Solvent Accessible VOID(S) in Structure | !           | Info   |
| PLAT779_ALERT_4_G | Suspect or Irrelevant (Bond) Angle(s) in CIF . #   | 747         | Check  |
|                   | B91 -F93 -B91 1.555 1.555 2.656                    | 30.20       | Deg.   |
| PLAT779_ALERT_4_G | Suspect or Irrelevant (Bond) Angle(s) in CIF . #   | 748         | Check  |
|                   | B91 -F94 -B91 2.656 1.555 1.555                    | 29.20       | Deg.   |
| PLAT789_ALERT_4_G | Atoms with Negative _atom_site_disorder_group #    | 17          | Check  |
| PLAT794_ALERT_5_G | Tentative Bond Valency for Co1 (II) .              | 1.54        | Info   |
| PLAT794_ALERT_5_G | Tentative Bond Valency for Co2 (II) .              | 1.56        | Info   |
| PLAT794_ALERT_5_G | Tentative Bond Valency for Co3 (II) .              | 1.51        | Info   |
| PLAT794_ALERT_5_G | Tentative Bond Valency for Co4 (II) .              | 1.50        | Info   |
| PLAT802_ALERT_4_G | CIF Input Record(s) with more than 80 Characters   | 7           | Info   |
| PLAT860_ALERT_3_G | Number of Least-Squares Restraints .....           | 5962        | Note   |
| PLAT869_ALERT_4_G | ALERTS Related to the Use of SQUEEZE Suppressed    | !           | Info   |
| PLAT883_ALERT_1_G | No Info/Value for _atom_sites_solution_primary .   | Please Do ! |        |
| PLAT910_ALERT_3_G | Missing # of FCF Reflection(s) Below Theta(Min).   | 1           | Note   |
| PLAT912_ALERT_4_G | Missing # of FCF Reflections Above STh/L= 0.600    | 52          | Note   |
| PLAT933_ALERT_2_G | Number of OMIT Records in Embedded .res File ...   | 32          | Note   |
| PLAT984_ALERT_1_G | The Co-f' = 0.3538 Deviates from the B&C-Value     | 0.3480      | Check  |
| PLAT985_ALERT_1_G | The Co-f" = 0.9121 Deviates from the B&C-Value     | 0.9239      | Check  |

---

0 **ALERT level A** = Most likely a serious problem - resolve or explain  
 0 **ALERT level B** = A potentially serious problem, consider carefully  
 13 **ALERT level C** = Check. Ensure it is not caused by an omission or oversight  
 53 **ALERT level G** = General information/check it is not something unexpected

11 ALERT type 1 CIF construction/syntax error, inconsistent or missing data  
 15 ALERT type 2 Indicator that the structure model may be wrong or deficient  
 6 ALERT type 3 Indicator that the structure quality may be low  
 30 ALERT type 4 Improvement, methodology, query or suggestion  
 4 ALERT type 5 Informative message, check

---

It is advisable to attempt to resolve as many as possible of the alerts in all categories. Often the minor alerts point to easily fixed oversights, errors and omissions in your CIF or refinement strategy, so attention to these fine details can be worthwhile. In order to resolve some of the more serious problems it may be necessary to carry out additional measurements or structure refinements. However, the purpose of your study may justify the reported deviations and the more serious of these should normally be commented upon in the discussion or experimental section of a paper or in the "special\_details" fields of the CIF. checkCIF was carefully designed to identify outliers and unusual parameters, but every test has its limitations and alerts that are not important in a particular case may appear. Conversely, the absence of alerts does not guarantee there are no aspects of the results needing attention. It is up to the individual to critically assess their own results and, if necessary, seek expert advice.

### **Publication of your CIF in IUCr journals**

A basic structural check has been run on your CIF. These basic checks will be run on all CIFs submitted for publication in IUCr journals (*Acta Crystallographica*, *Journal of Applied Crystallography*, *Journal of Synchrotron Radiation*); however, if you intend to submit to *Acta Crystallographica Section C* or *E* or *IUCrData*, you should make sure that full publication checks are run on the final version of your CIF prior to submission.

### **Publication of your CIF in other journals**

Please refer to the *Notes for Authors* of the relevant journal for any special instructions relating to CIF submission.

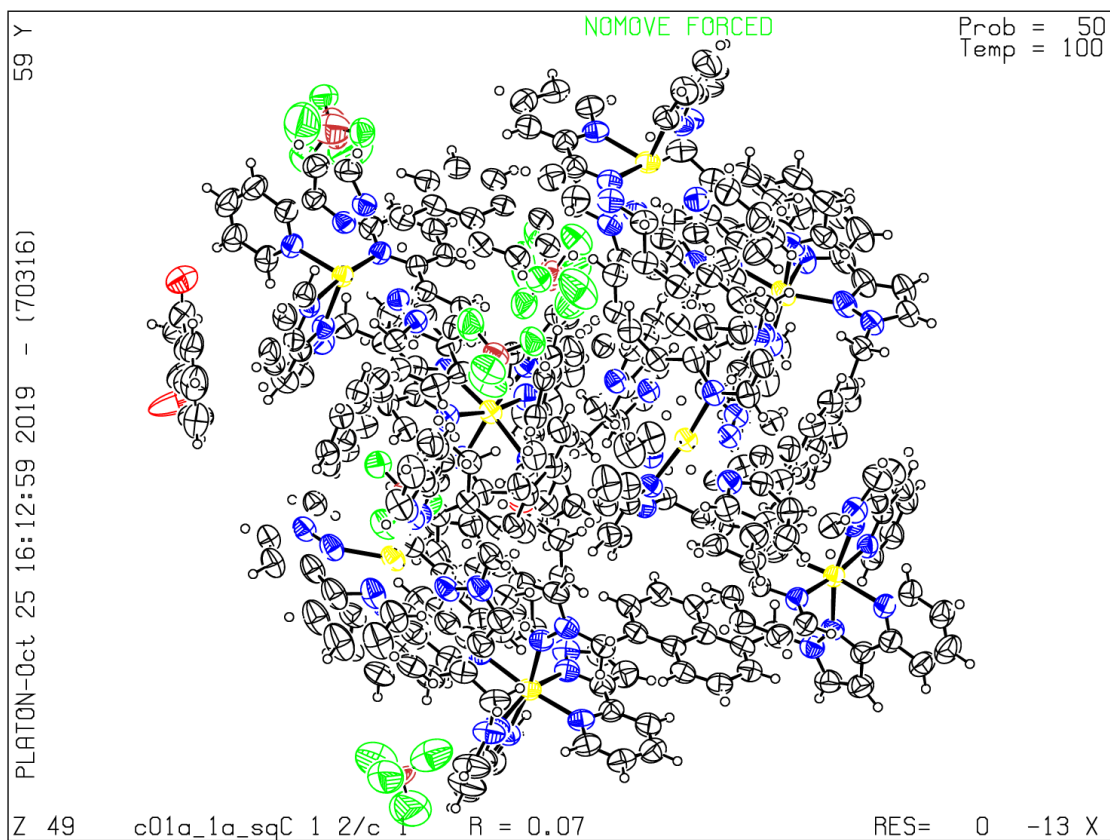

Supplement: s1 [file s1]
